# Supplementary material for: Carbon nanotubes coupled with layered graphite to support SnTe nanodots as high-rate and ultra-stable lithium-ion battery anodes
Source: Royal Society of Chemistry journal article supplement (doi:10.1039/d0nr07355e), 2021-01-01
Supplement: d0nr07355e1.pdf [file d0nr07355e1.pdf]

## Carbon Nanotubes Coupled with Layered Graphite to Support SnTe Nanodots as High-Rate and Ultra-Stable Lithium Ion Battery Anodes

Huanhui Chen<sup>1,a,b</sup>, Guanxia Ke<sup>1,a</sup>, Xiaochao Wu<sup>1,a</sup>, Wanqing Li<sup>a</sup>, Hongwei Mi<sup>a</sup>, Yongliang Li<sup>a</sup>, Lingna Sun

<sup>a</sup>, Qianling Zhang<sup>a</sup>, Chuanxin He<sup>a</sup>, Xiangzhong Ren<sup>a,\*</sup>

<sup>a</sup> College of Chemistry and Environmental Engineering, Shenzhen University, Shenzhen, Guangdong 518060, P.R. China

<sup>b</sup> Shenzhen Engineering Lab of Flexible Transparent Conductive Films, School of Materials Science and Engineering, Harbin Institute of Technology,

Shenzhen 518055, China

**\*Corresponding author.**

Xiangzhong Ren, Email: [renxz@szu.edu.cn](mailto:renxz@szu.edu.cn), Tel/Fax: +86-755-26558134

<sup>1</sup> These authors contributed equally to this work.

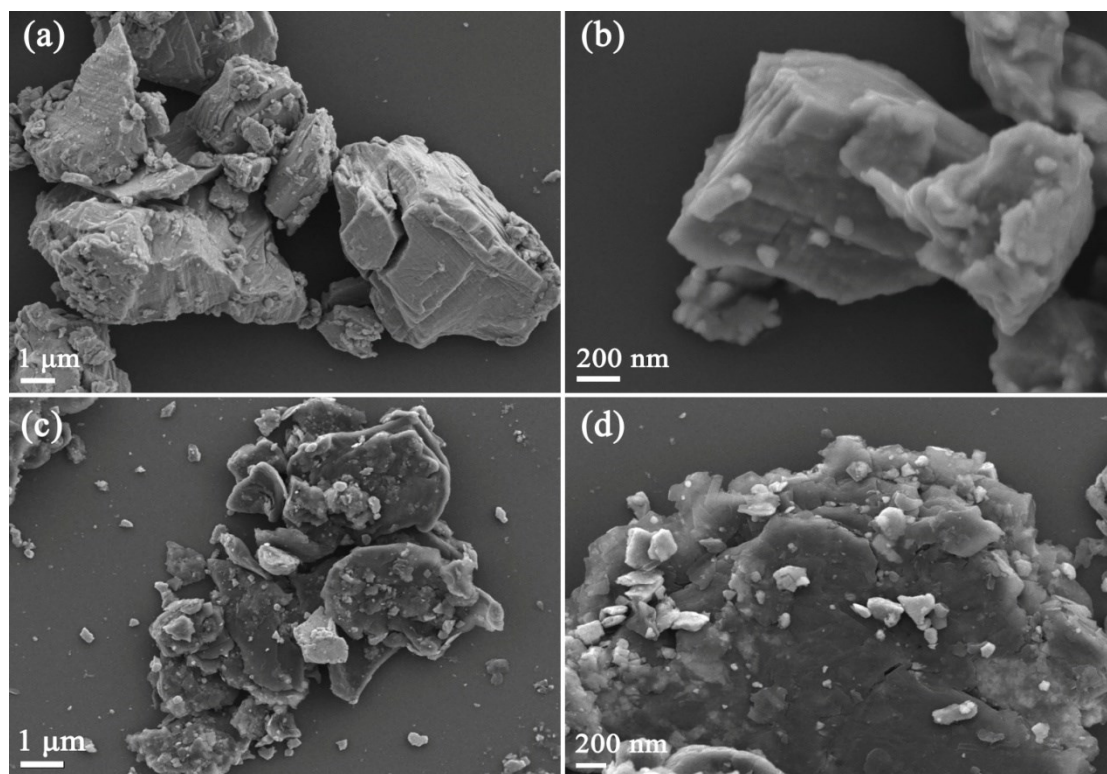

**Fig. S1** (a-b) The SEM images of pure SnTe at different magnification. (c-d) The SEM images of SnTe-G at different magnification.

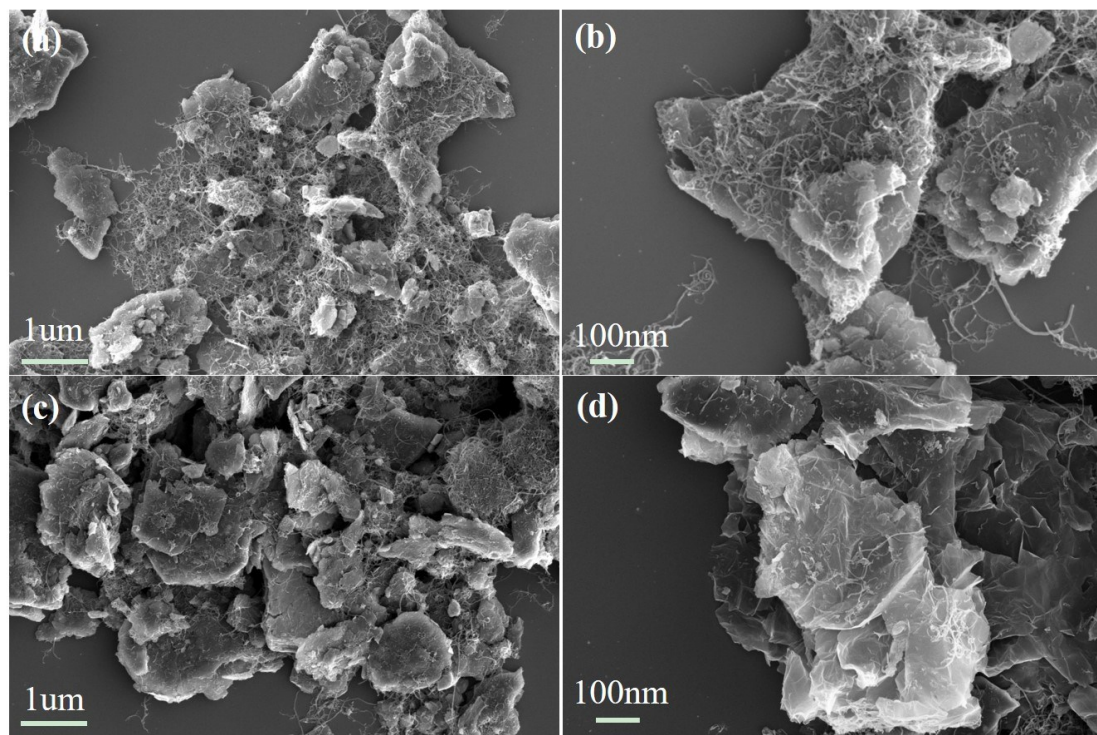

**Fig. S2** (a-b) The SEM images of SnTe-CNT-G-0.6 different magnification. (c-d) The SEM images of SnTe-CNT-G-1.0 at different

magnification.

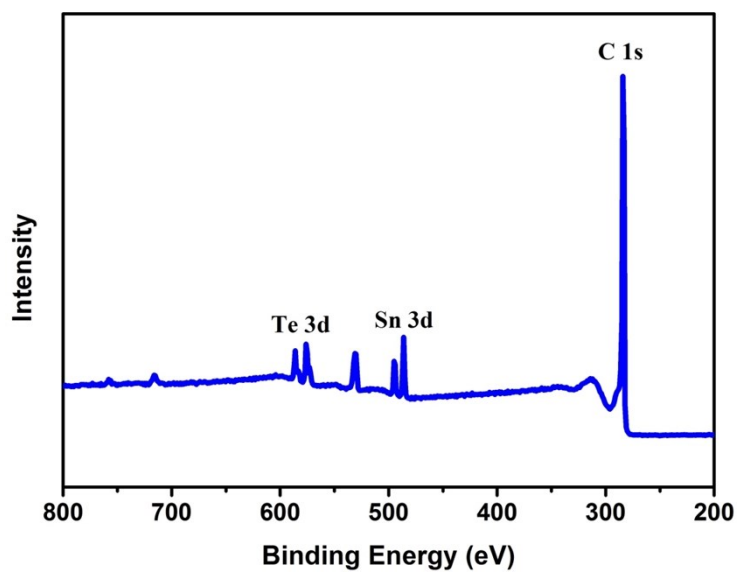

Fig. S3 XPS survey-scan spectra of SnTe-CNT-G.

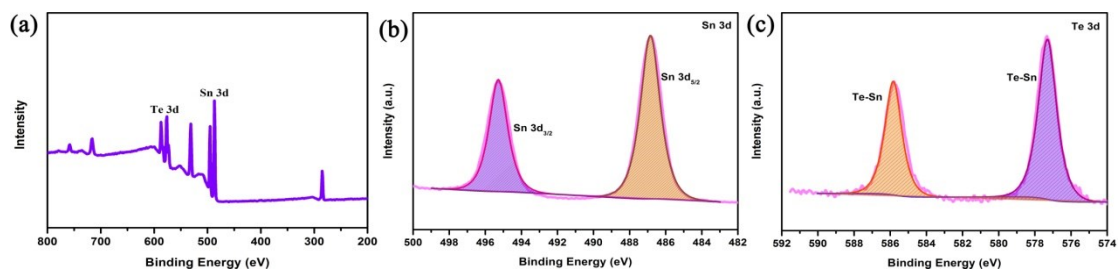

Fig. S4 XPS survey-scan spectra of SnTe (a), Core level spectra of Sn 3d (b) and Te 3d (c).

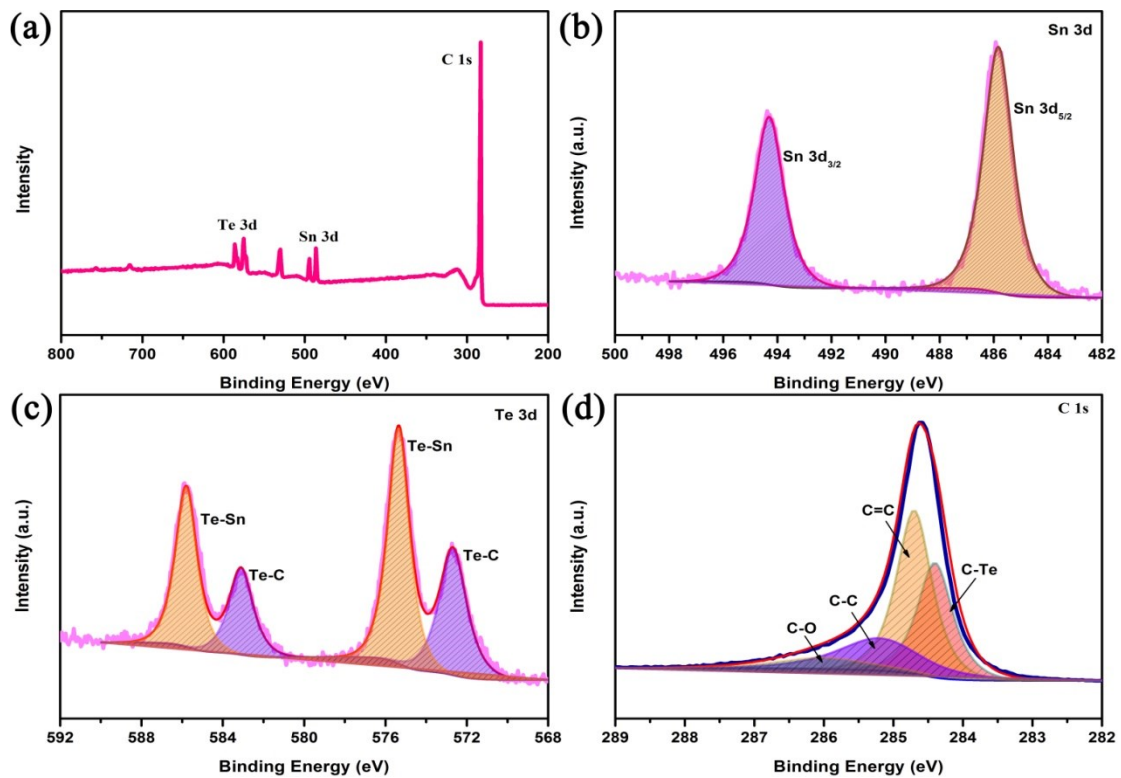

Fig. S5 XPS survey-scan spectra of SnTe-G (a), Core level spectra of Sn 3d (c), Te 3d (d) and C 1s (e).

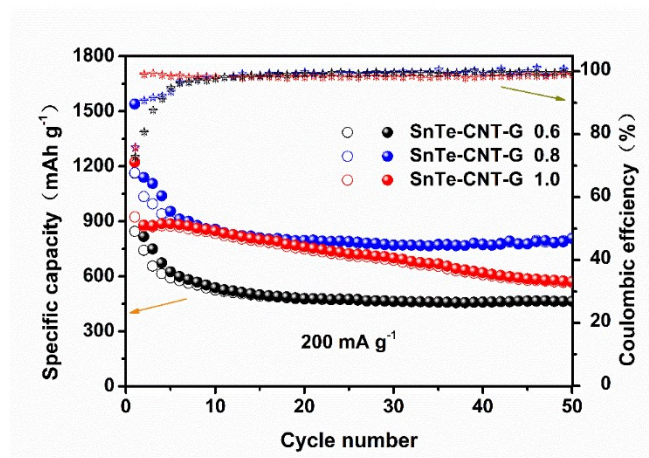

Fig. S6 Cycling performance and Coulomb efficiency of SnTe-CNT-G with different graphite content at 200 mA g<sup>-1</sup>.

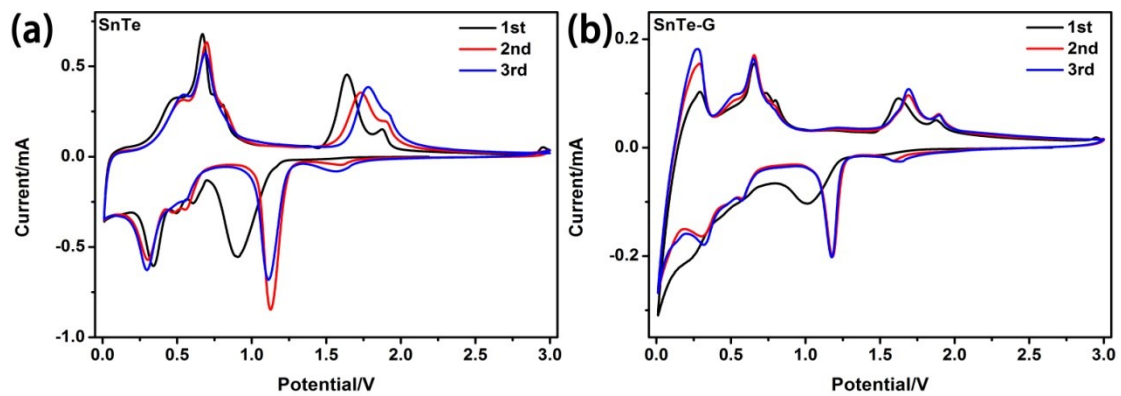

Fig. S7 (a) CV curves of the SnTe-CNT-G anodes at 0.2 mV/s; (b) CV curves of the SnTe-CNT-G anodes at 0.2 mV/s.

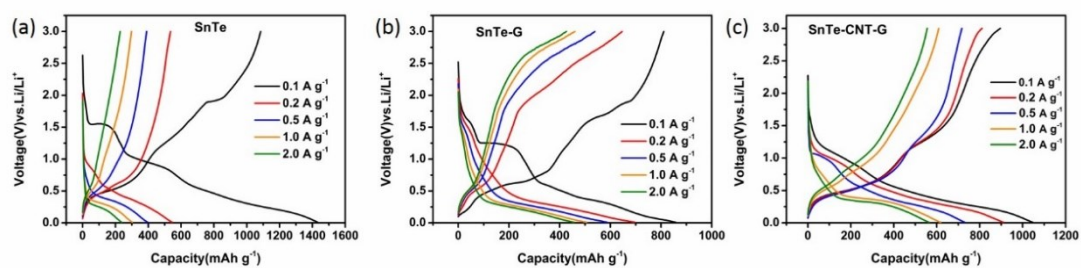

Fig.S8 The galvanostatic charge-discharge profiles at varied current density of a) SnTe; b) SnTe-G; c) SnTe-CNT-G.

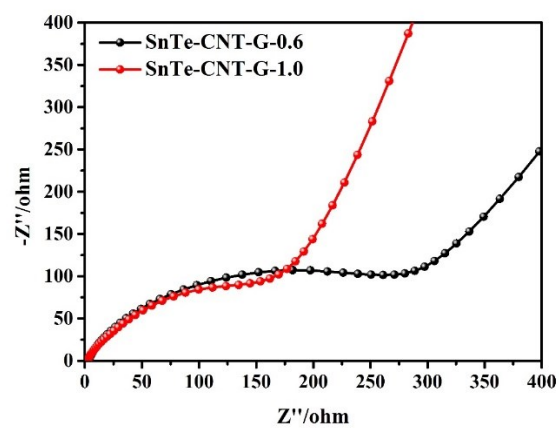

Fig. S9 Nyquist plots of SnTe-CNT-G with different graphite content.



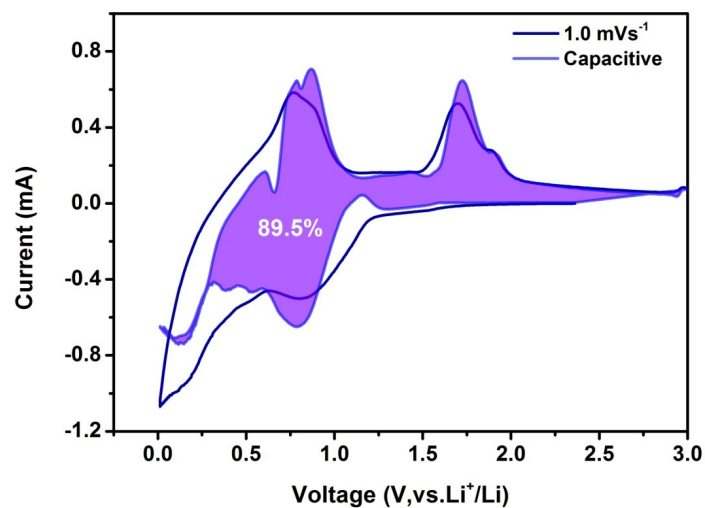

Fig. S10 The pseudocapacitance contribution ratios of the SnTe-CNT-G electrodes at a scan rate of  $1 \text{ mV s}^{-1}$ .

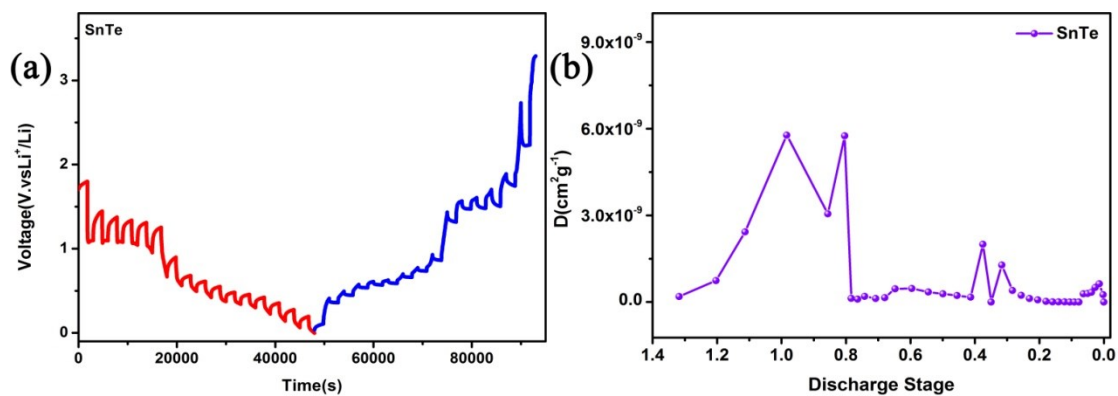

Fig. S11 GITT curves of the SnTe electrode (a) and their  $\text{Li}^+$  diffusion coefficient for the initial discharge states (b).

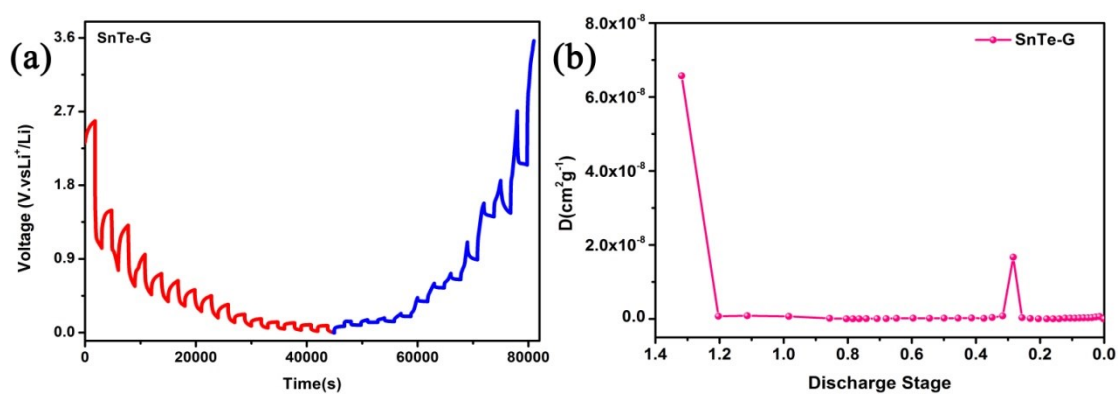

Fig. S12 GITT curves of the SnTe-G electrode (a) and their  $\text{Li}^+$  diffusion coefficient for the initial discharge states (b).

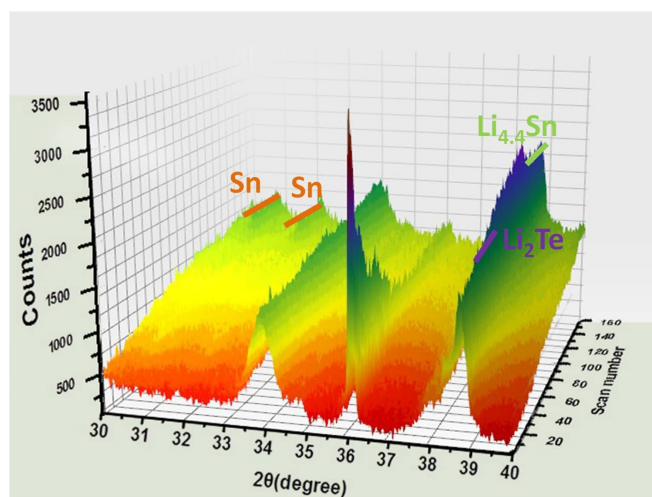

Fig. S13 3D contour plots of in-situ XRD patterns for SnTe-CNT-G anodes during the initial cycle.

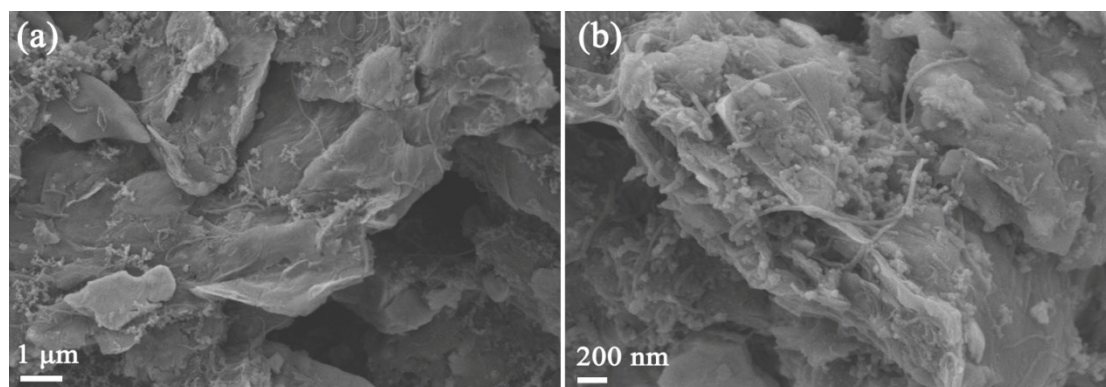

Fig. S14 (a-b) SEM images of SnTe-CNT-G electrode before cycling.

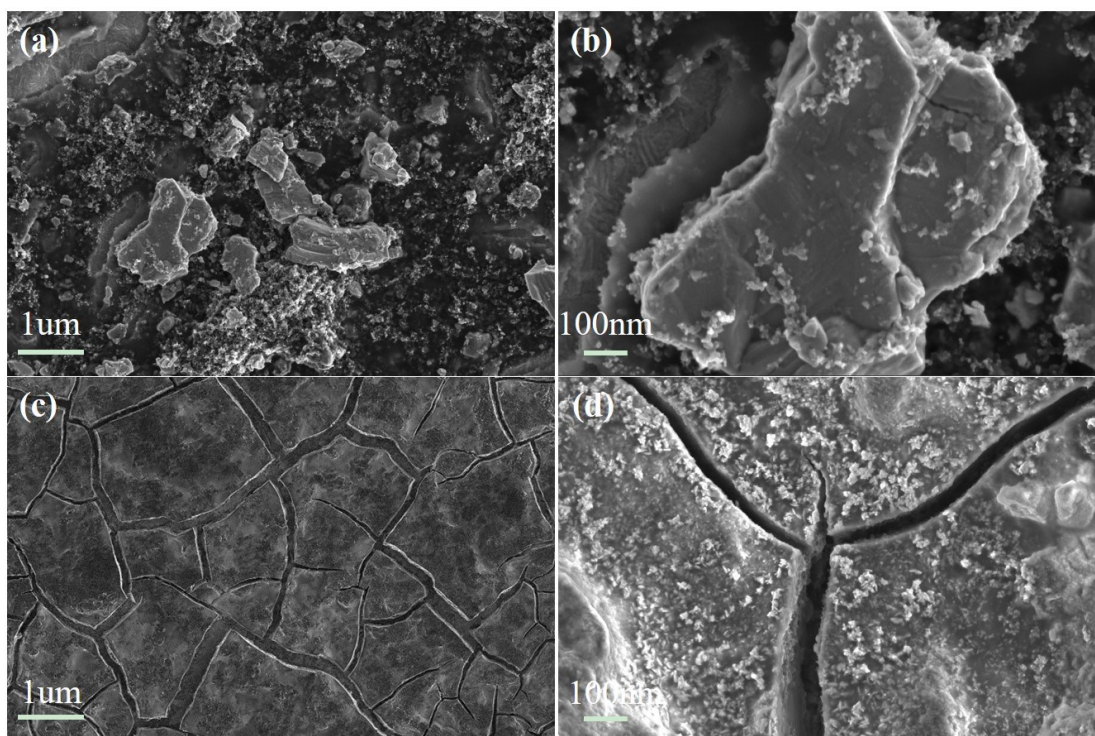

Fig. S15 (a-b) SEM images of SnTe electrode before cycling; (c-d) SEM images of SnTe electrode at 200 mA g<sup>-1</sup> after 100 cycles.

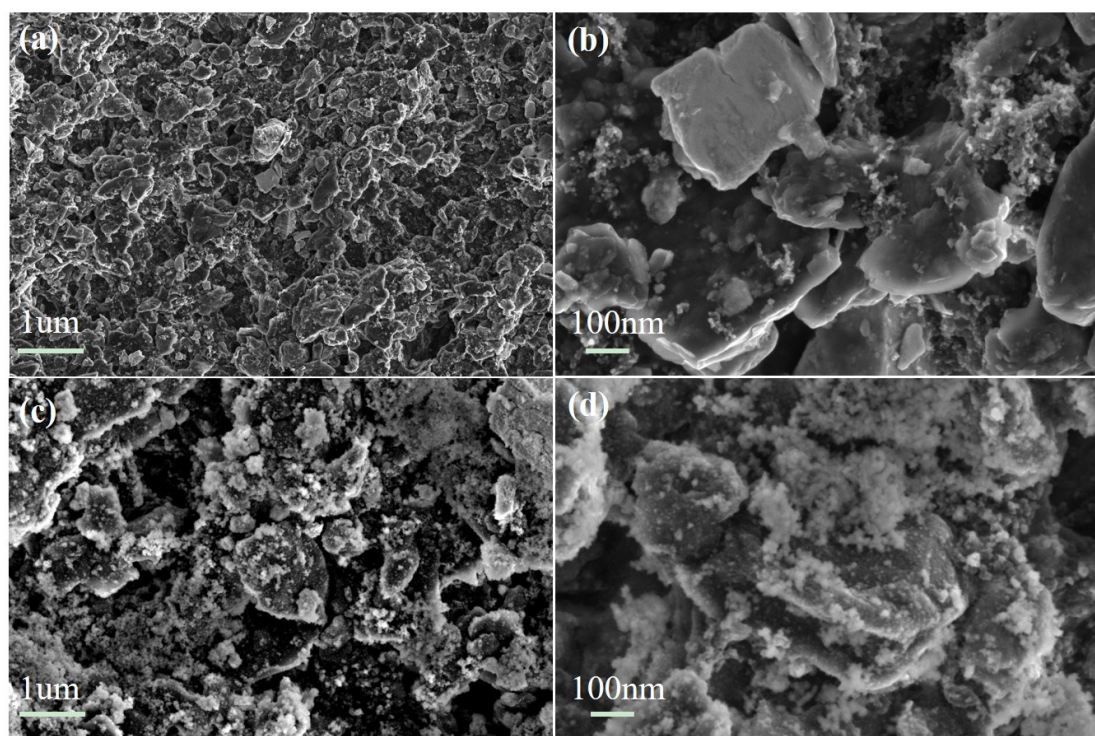

Fig. S16 (a-b) SEM images of SnTe-G electrode before cycling; (c-d) SEM images of SnTe-G electrode at 200 mA g<sup>-1</sup> after 100 cycles.



**Table S1.** Comparison of the electrochemical lithium storage performance of the SnTe-CNT-G electrodes with the literature data.

| Materials                                                          | Reversible capacity (mAhg <sup>-1</sup> )/Cycle number |                       |                        |                        | Ref.             |
|--------------------------------------------------------------------|--------------------------------------------------------|-----------------------|------------------------|------------------------|------------------|
|                                                                    | Current density                                        | Current density       | Current density        | Current density        |                  |
|                                                                    | 100mA g <sup>-1</sup>                                  | 200mA g <sup>-1</sup> | 1000mA g <sup>-1</sup> | 2000mA g <sup>-1</sup> |                  |
| Sb <sub>2</sub> Te <sub>3</sub> @Gra                               | 570/200th                                              |                       |                        | 372/200th              | 1                |
| SnSb <sub>2</sub> Te <sub>4</sub> /G                               |                                                        | 574/100th             | 478/1000th             |                        | 2                |
| MoTe <sub>2</sub> /FLG                                             | 674/150th                                              |                       |                        | 335/10th               | 3                |
| Ge <sub>2</sub> Sb <sub>2</sub> Te <sub>5</sub>                    | 947/100th                                              |                       |                        | 546/10th               | 4                |
| SnSe <sub>2</sub> QDs/rGO                                          |                                                        | 746/500th             |                        | 460/3000th             | 5                |
| C/SnO/Sn                                                           | 816/100th                                              |                       | 504/1000th             |                        | 6                |
| SnS/CNFs                                                           |                                                        | 648/500th             | 520/2400th             | 167/10th               | 7                |
| Sn/NMCs                                                            |                                                        | 472/500th             | 437/1600th             |                        | 8                |
| SnO <sub>2</sub> /Ti <sub>3</sub> C <sub>2</sub>                   |                                                        |                       | 530/500th              | 489/10th               | 9                |
| SnO <sub>2</sub> QDs/Ti <sub>3</sub> C <sub>2</sub> T <sub>x</sub> | 660/100th                                              |                       | 522/10th               | 410/10th               | 10               |
| <b>SnTe-CNT-G</b>                                                  |                                                        | <b>840/100th</b>      |                        | <b>669/1400th</b>      | <b>This work</b> |

## References

1. Y. Wei, J. Chen, S. Wang, X. Zhong, R. Xiong, L. Gan, Y. Ma, T. Zhai and H. Li, *ACS Applied Materials Interfaces*, 2020, **12**, 16264-16275.
2. Z. Wu, G. Liang, W. K. Pang, T. Zhou, Z. Cheng, W. Zhang, Y. Liu, B. Johannessen and Z. Guo, *Advanced Materials*, 2020, **32**, e1905632.
3. N. Ma, X. Y. Jiang, L. Zhang, X. S. Wang, Y. L. Cao and X. Z. Zhang, *Small*, 2018, **14**, e1703680.
4. Y. Wei, L. Huang, J. Chen, Y. Guo, S. Wang, H. Li and T. Zhai, *ACS Applied Materials Interfaces*, 2019, **11**, 41374-41382.

5. Z. Xiang Huang, B. Liu, D. Kong, Y. Wang and H. Ying Yang, *Energy Storage Materials*, 2018, **10**, 92-101.
6. Y. Cheng, Z. Yi, C. Wang, Y. Wu and L. Wang, *Chemical Engineering Journal*, 2017, **330**, 1035-1043.
7. J. Xia, L. Liu, S. Jamil, J. Xie, H. Yan, Y. Yuan, Y. Zhang, S. Nie, J. Pan, X. Wang and G. Cao, *Energy Storage Materials*, 2019, **17**, 1-11.
8. H. Ying, S. Zhang, Z. Meng, Z. Sun and W.-Q. Han, *Journal of Materials Chemistry A*, 2017, **5**, 8334-8342.
9. Y. T. Liu, P. Zhang, N. Sun, B. Anasori, Q. Z. Zhu, H. Liu, Y. Gogotsi and B. Xu, *Advanced Materials*, 2018, **30**, e1707334.
10. H. Liu, X. Zhang, Y. Zhu, B. Cao, Q. Zhu, P. Zhang, B. Xu, F. Wu and R. Chen, *Nano-Micro Letters*, 2019, **11**.
